# Supplementary material
Source: bioRxiv or medRxiv preprint supplement (https://www.biorxiv.org/highwire/filestream/140155/field_highwire_adjunct_files/0/343046-1.pdf)
Supplement: Supplementary file [file 343046-1.pdf]

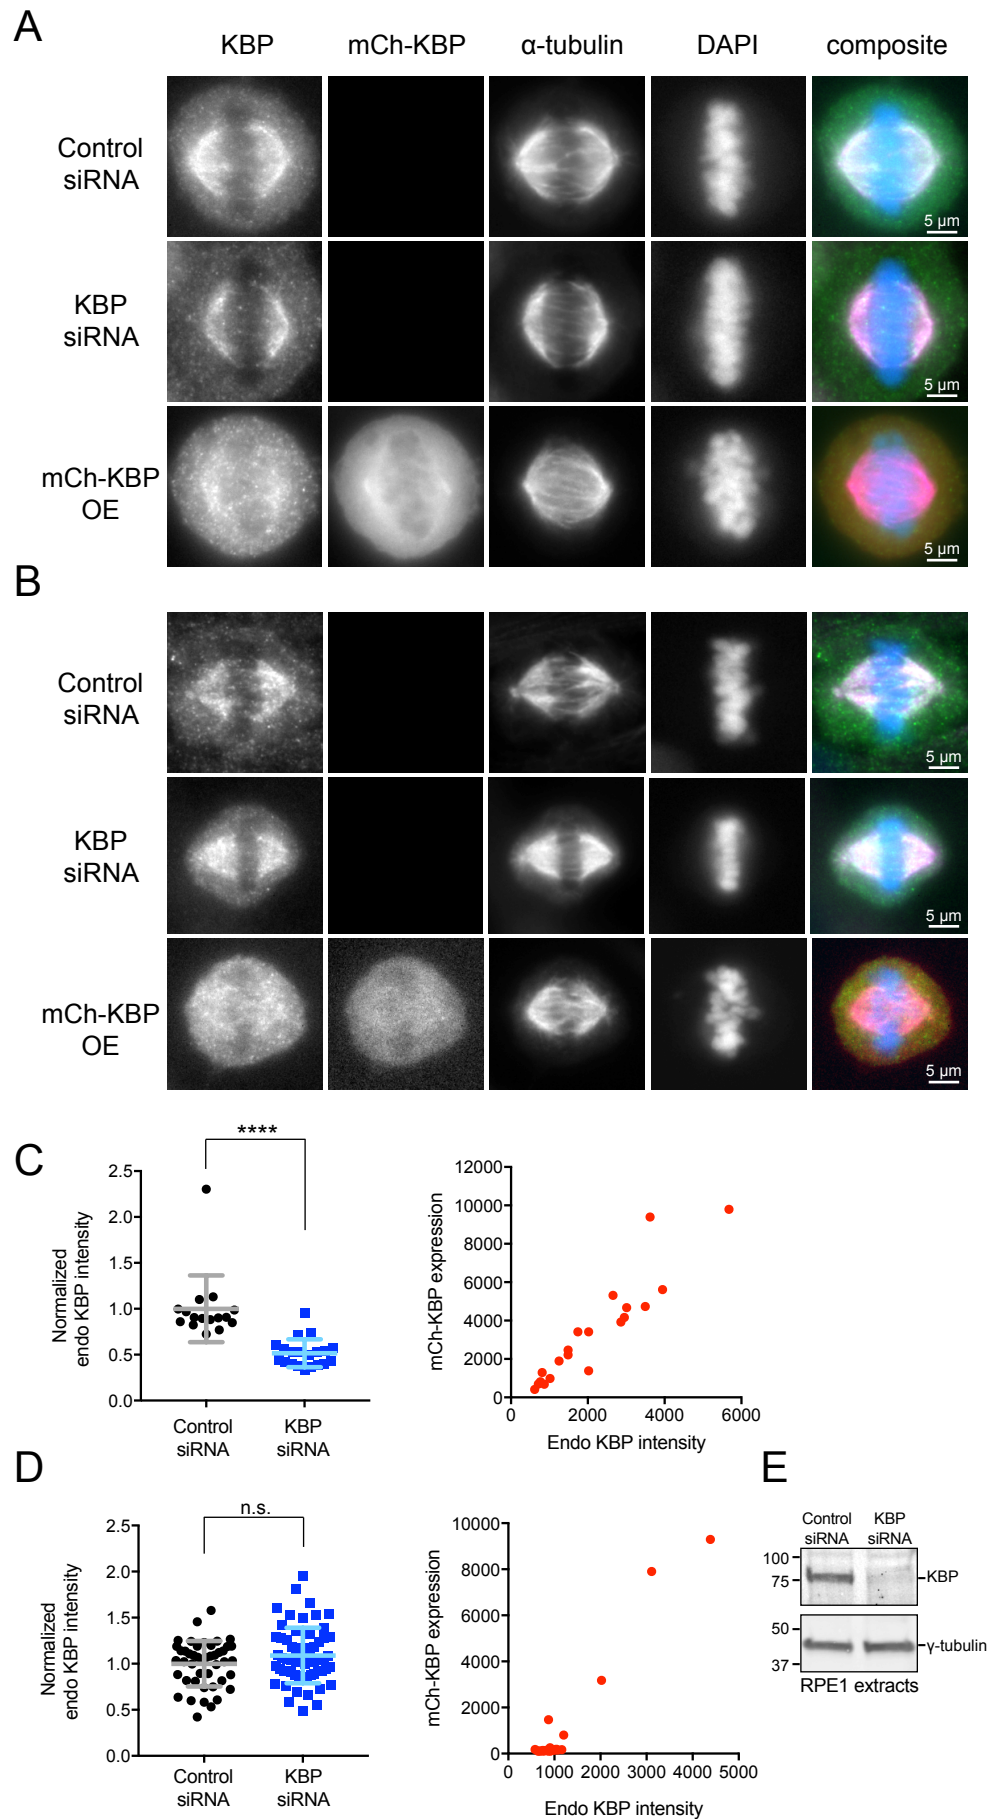

**Figure S1**

**A**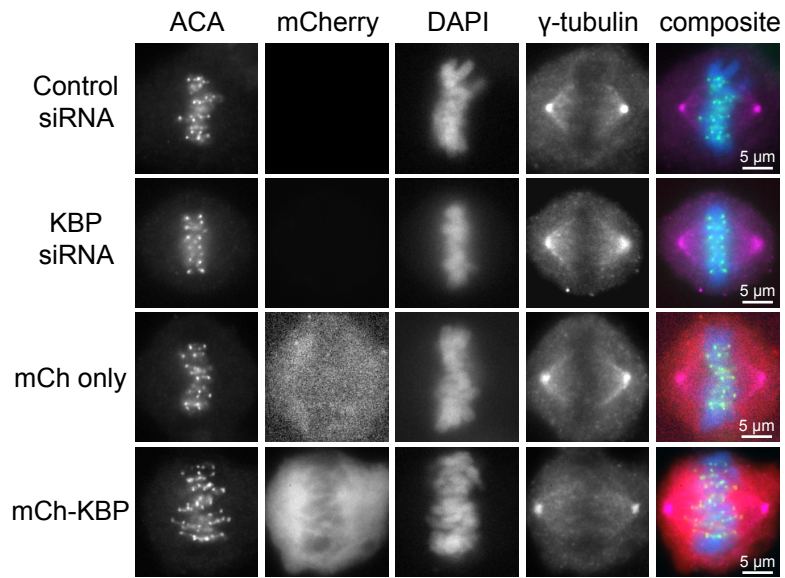**B**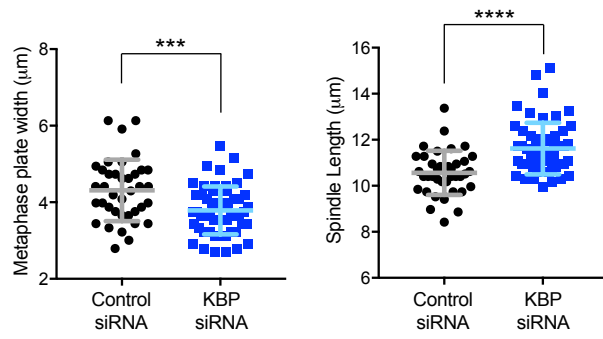**C**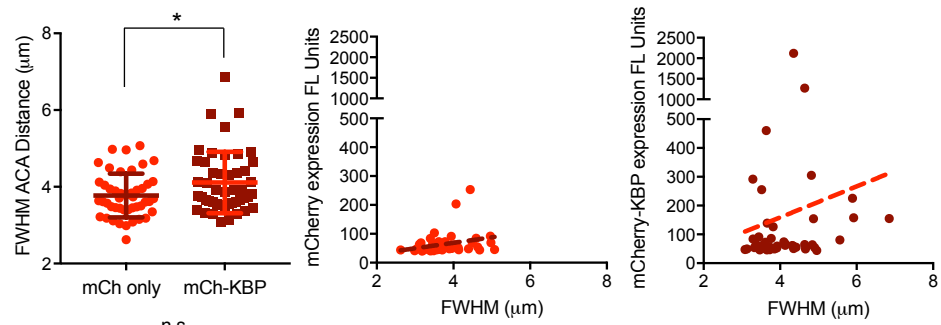**D**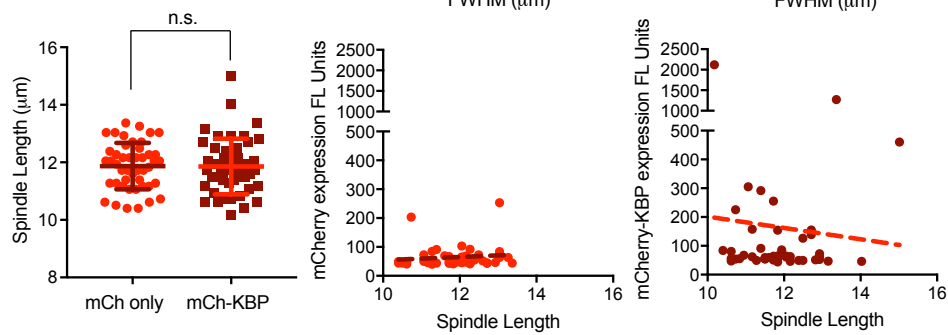

*Figure S2*

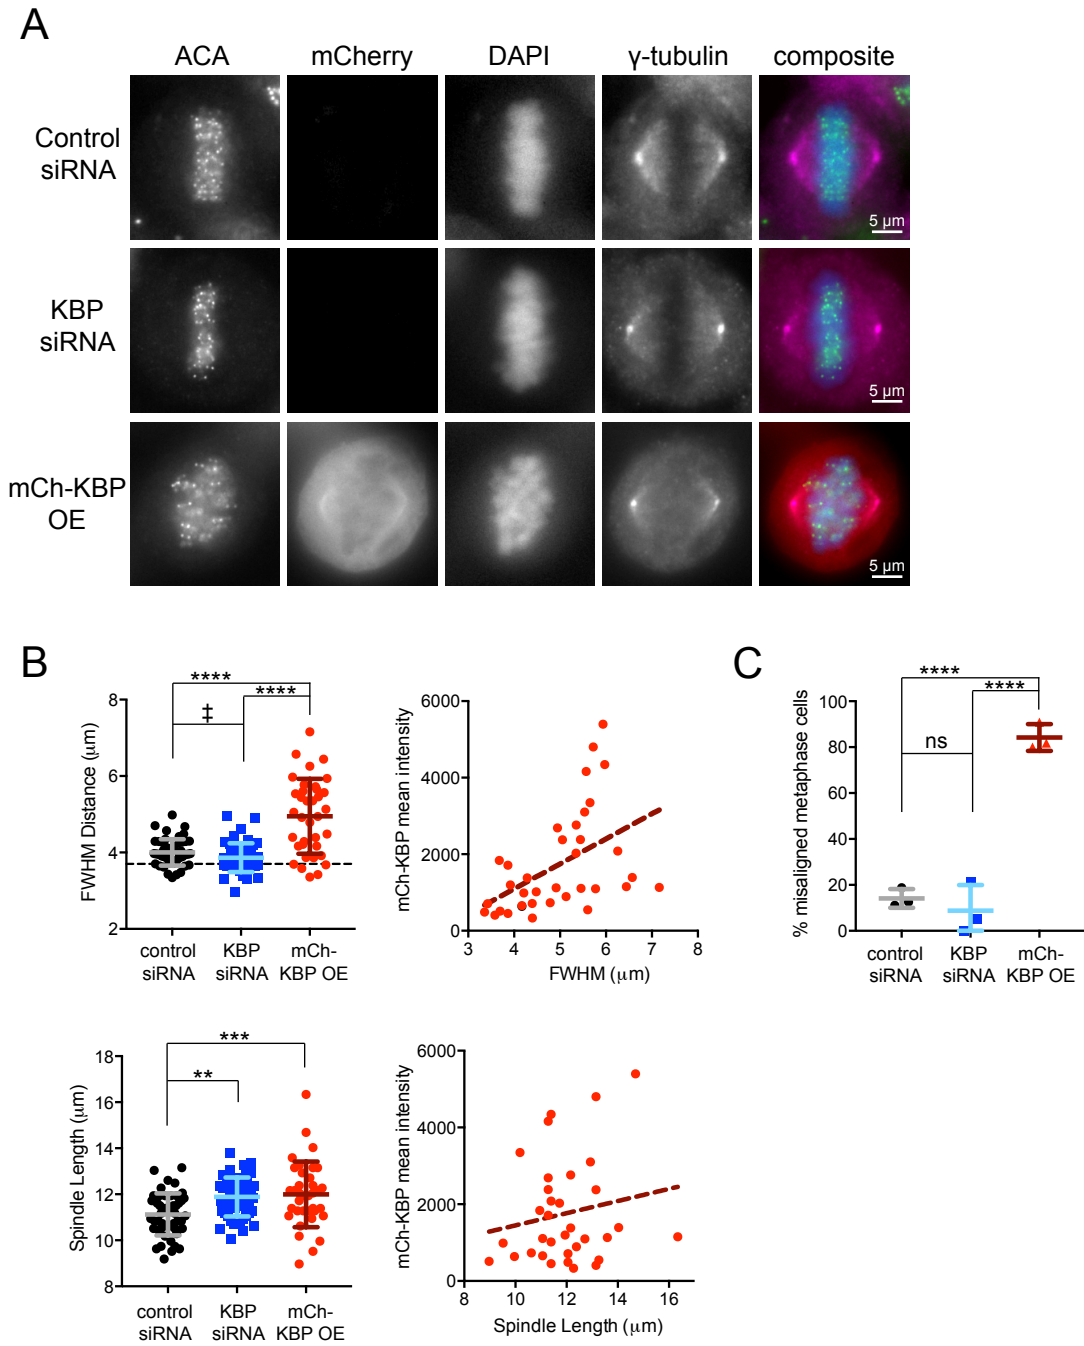

Figure S3

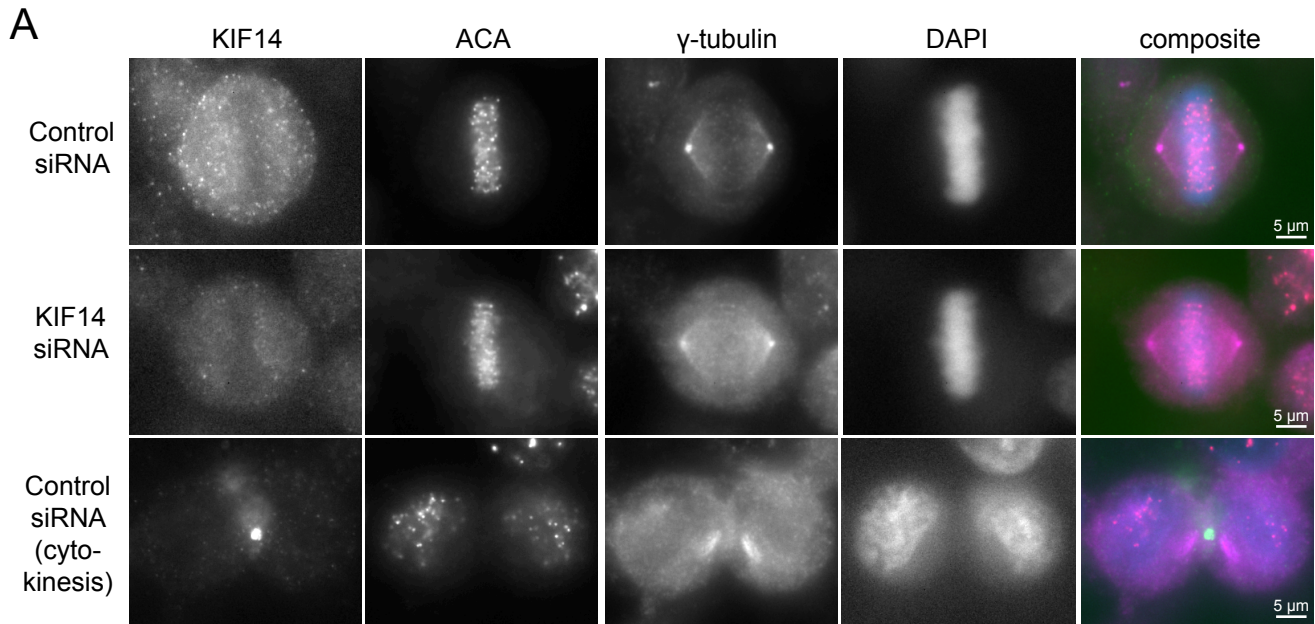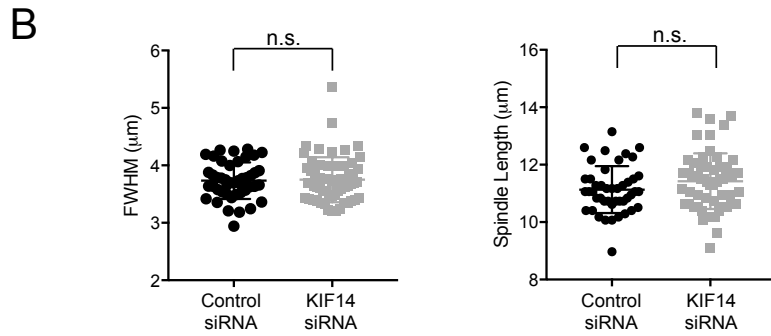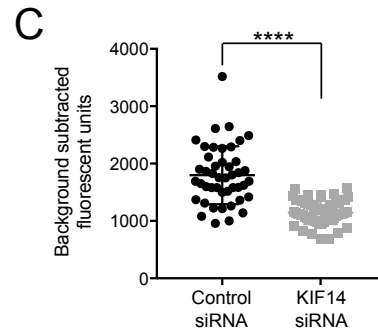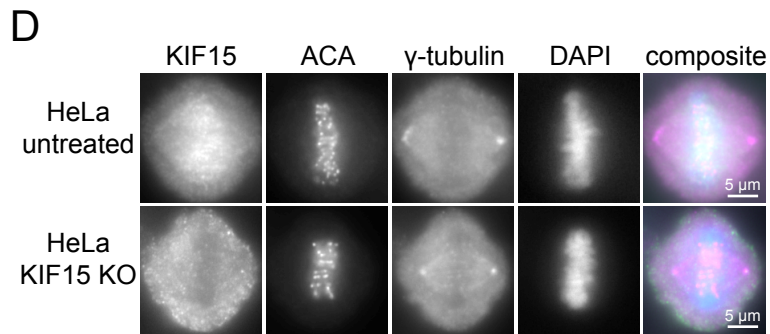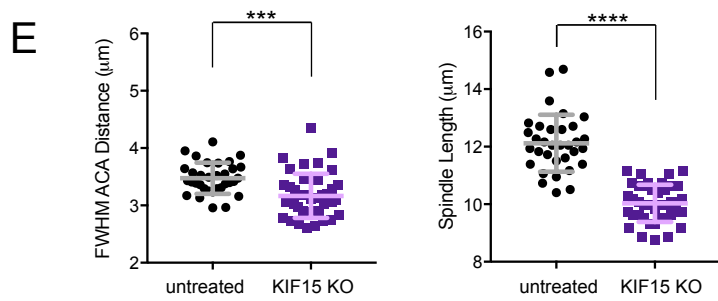

Figure S4

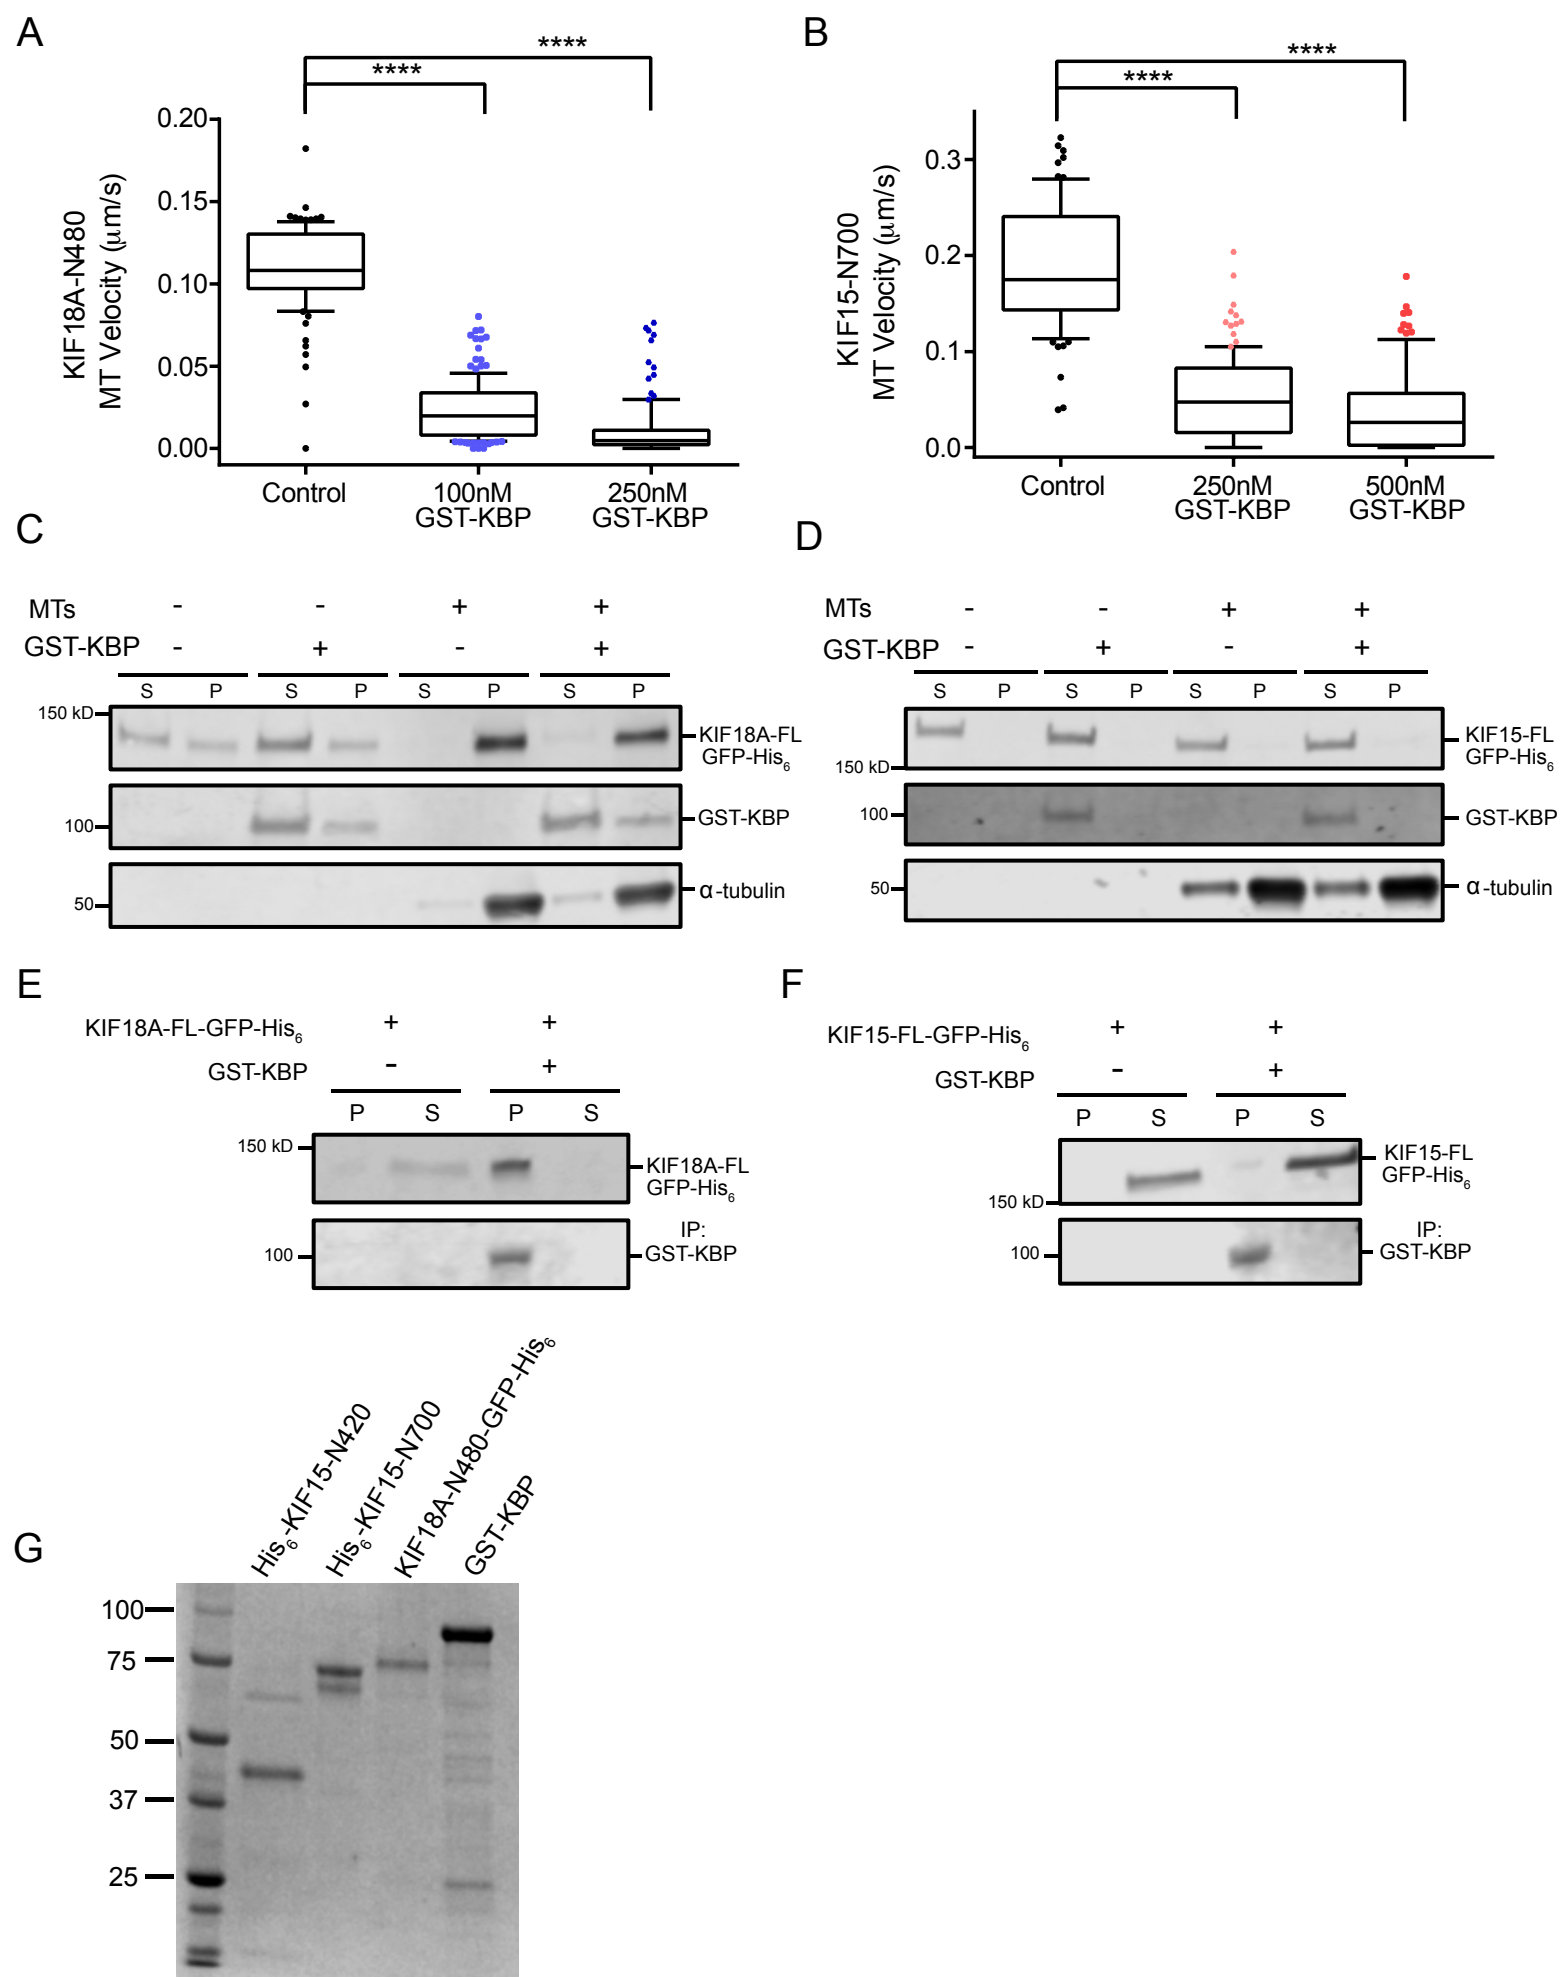

Figure S5
